# Supplementary material for: Identification and validation of calcium extrusion-related genes prognostic signature in colon adenocarcinoma
Source: PeerJ journal article supplement (doi:10.7717/peerj.17582), 2024-07-10

A

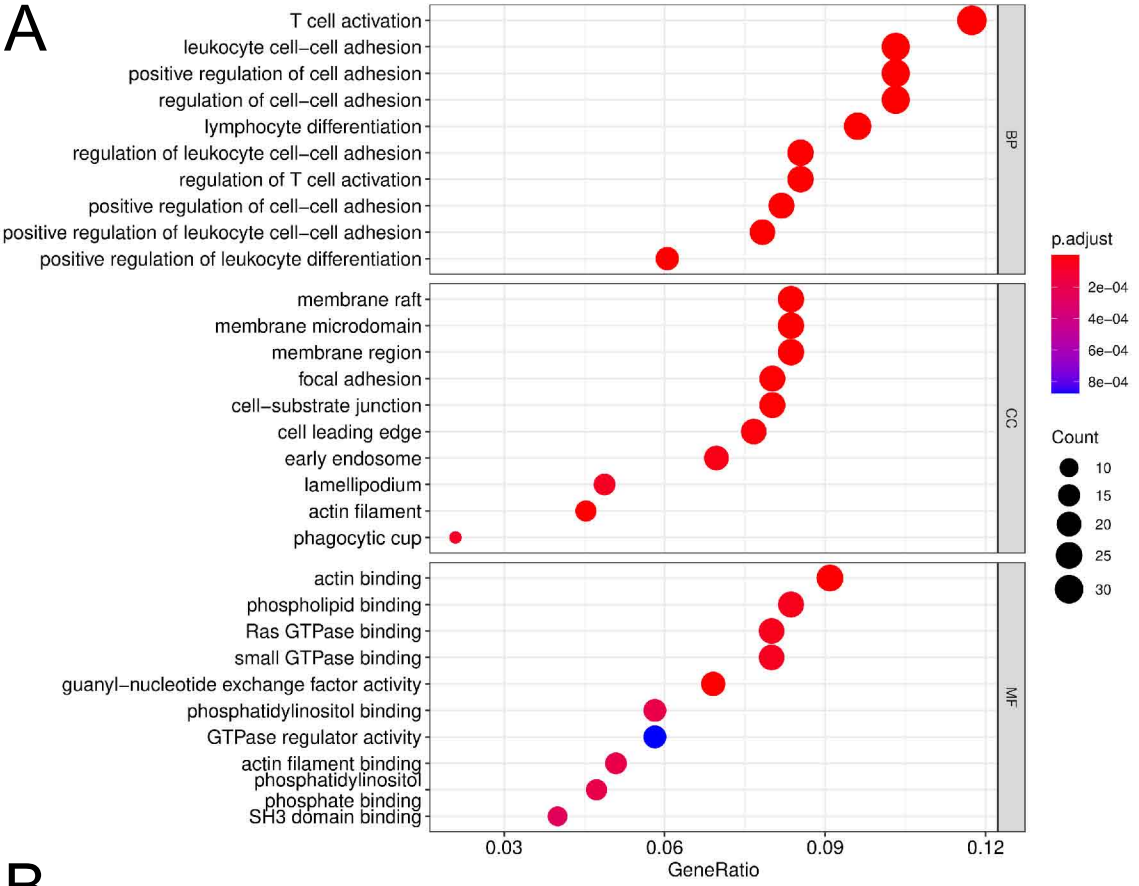

B

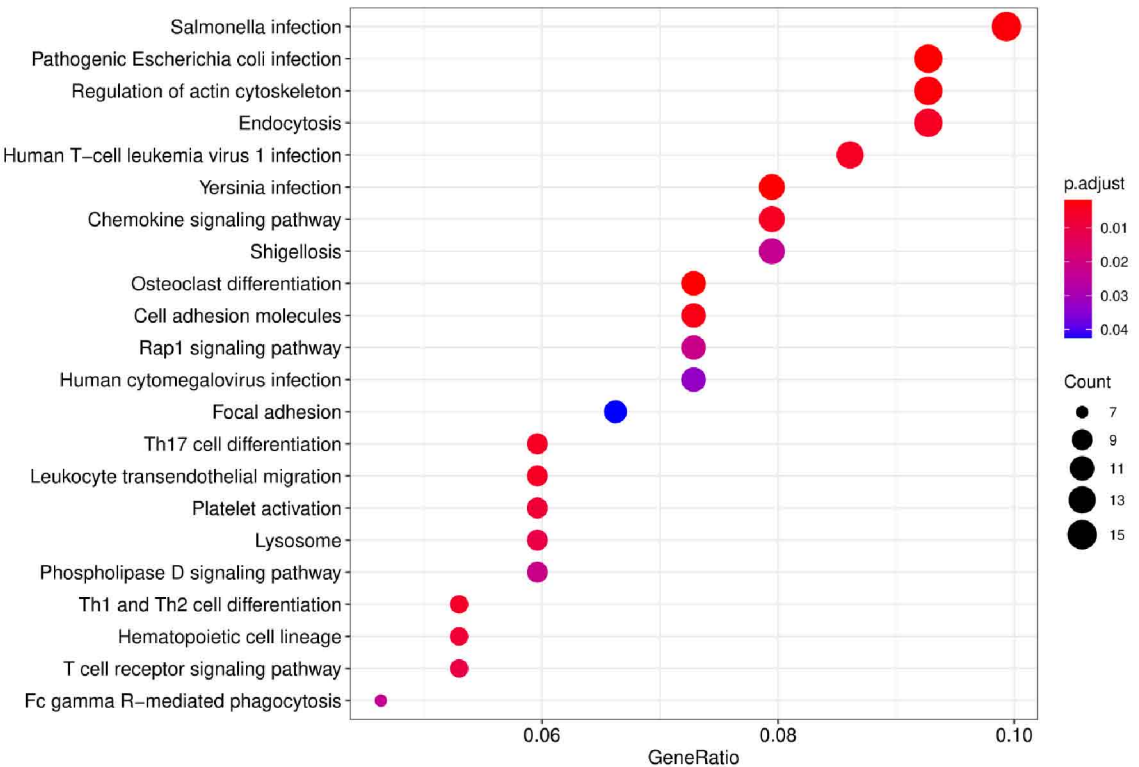

Supplement: Figure_S6.pdf [file Figure_S6.pdf]
