# Supplementary material for: Identification and validation of calcium extrusion-related genes prognostic signature in colon adenocarcinoma
Source: PeerJ. 2024 Jul 10;12:e17582. doi: 10.7717/peerj.17582 (PMC11246022; doi:10.7717/peerj.17582)
Supplement: Supplemental Information 1 [file peerj-12-17582-s014.xlsx]

## Sheet: CCK8 assay
	The relative SLC8A3 mRNA expression
	SW480	SW620	HT-29	RKO	DLD-1	HCT-116
1	1.03	1.49	1.36	1.46	1.92	2.23
2	0.93	1.38	1.58	1.33	1.96	2.11
3	1.08	1.36	1.34	1.49	1.92	2.39
	The relative SLC24A2 mRNA expression
	HT-29	SW480	RKO	HCT-116	DLD-1	SW620
1	1	1.15	1.59	2.23	2.28	2.64
2	0.94	1.18	1.73	2.12	2.15	2.74
3	0.96	1.07	1.74	2.05	2.28	2.58
	The relative SLC24A3 mRNA expression
	SW480	HCT-116	HT-29	RKO	DLD-1	SW620
1	1.02	1.35	2	2.04	2.78	3.12
2	0.98	1.22	1.88	2.17	2.61	3.04
3	1.03	1.18	1.91	1.95	2.61	2.91
	The relative SLC24A4 mRNA expression
	DLD-1	RKO	HT-29	SW480	HCT-116	SW620
1	1.07667	1.12667	1.45667	1.65667	1.79667	1.95667
2	1.08667	1.29	1.42	1.86667	1.74667	1.82
3	1.13	1.37	1.33	1.51	1.71	1.74
