# Supplementary material for: Identification and validation of calcium extrusion-related genes prognostic signature in colon adenocarcinoma
Source: PeerJ. 2024 Jul 10;12:e17582. doi: 10.7717/peerj.17582 (PMC11246022; doi:10.7717/peerj.17582)
Supplement: Supplemental Information 3 [file peerj-12-17582-s016.xlsx]

## Sheet: CCK8 assay
	sictrl			siSLC8A3					EV			SLC8A3
1	0.486	0.515	0.464	0.518	0.47	0.457		1	0.548	0.426	0.544	0.445	0.517	0.43
2	0.632	0.632	0.646	0.661	0.716	0.685		2	0.706	0.729	0.836	0.662	0.632	0.633
3	0.925	0.831	0.862	1.105	1.01	1.046		3	0.87	0.999	0.978	0.729	0.778	0.855
4	1.097	1.028	0.961	1.283	1.247	1.211		4	1.188	1.159	1.042	0.81	0.926	0.927
5	0.971	1.17	1.112	1.547	1.417	1.389		5	1.361	1.348	1.312	1.023	1.059	1.081
	sictrl			siSLC24A2					EV			SLC24A2
1	0.64	0.674	0.594	0.606	0.537	0.509		1	0.422	0.488	0.417	0.425	0.484	0.406
2	0.906	0.866	0.825	0.854	0.861	0.728		2	0.628	0.552	0.568	0.444	0.593	0.506
3	1.135	1.075	1.064	1.066	1.021	0.912		3	0.769	0.724	0.648	0.621	0.769	0.747
4	1.23	1.131	1.244	1.182	1.166	1.211		4	0.954	0.955	0.886	0.868	0.958	0.94
5	1.595	1.548	1.43	1.469	1.544	1.459		5	1.175	1.21	1.235	1.277	1.246	1.189
	sictrl			siSLC24A4					EV			SLC24A4
1	0.419	0.423	0.417	0.471	0.409	0.392		1	0.381	0.34	0.41	0.392	0.4	0.401
2	0.594	0.549	0.659	0.611	0.696	0.698		2	0.49	0.528	0.533	0.425	0.499	0.409
3	0.651	0.765	0.775	1.009	0.923	0.96		3	0.755	0.861	0.837	0.675	0.565	0.568
4	0.769	0.891	0.861	1.124	1.095	1.158		4	0.934	0.964	1.029	0.701	0.622	0.68
5	1.009	0.923	0.96	1.483	1.441	1.647		5	1.12	1.337	1.377	0.963	0.841	0.862
	sictrl			siSLC24A3					EV			SLC24A3
1	0.458	0.511	0.486	0.491	0.428	0.433		1	0.798	0.706	0.777	0.754	0.741	0.724
2	0.624	0.716	0.628	0.593	0.628	0.656		2	0.989	0.978	0.997	0.902	1.016	1.055
3	0.973	0.799	0.737	0.907	0.771	0.896		3	1.256	1.263	1.1804	1.306	1.301	1.314
4	1.141	0.914	0.972	1.057	0.977	1.172		4	1.566	1.564	1.439	1.508	1.563	1.494
5	1.424	1.338	1.452	1.477	1.421	1.39		5	1.719	1.691	1.685	1.833	1.782	1.721
