# Supplementary material for: Identification and validation of calcium extrusion-related genes prognostic signature in colon adenocarcinoma
Source: PeerJ. 2024 Jul 10;12:e17582. doi: 10.7717/peerj.17582 (PMC11246022; doi:10.7717/peerj.17582)
Supplement: Supplemental Information 4 [file peerj-12-17582-s017.xlsx]

## Sheet: Sheet1
sictrl	siSLC8A3		sictrl	siSLC24A2
128	183		151	170
120	190		148	160
112	172		168	172
sictrl	siSLC24A3		sictrl	siSLC24A4
105	94		100	200
95	90		88	192
110	109		82	211
EV	SLC8A3		EV	SLC24A2
105	68		90	88
118	80		85	92
102	74		88	78
EV	SLC24A3		EV	SLC24A4
152	141		111	60
156	128		120	85
144	150		99	69
