# Supplementary material for: Identification and validation of calcium extrusion-related genes prognostic signature in colon adenocarcinoma
Source: PeerJ. 2024 Jul 10;12:e17582. doi: 10.7717/peerj.17582 (PMC11246022; doi:10.7717/peerj.17582)
Supplement: Supplemental Information 5 [file peerj-12-17582-s018.xlsx]

## Sheet: Sheet1
sictrl	siSLC8A3		sictrl	siSLC24A2
1.08	1.65		1.02	1.09
1.02	1.6		0.98	1.06
0.96	1.75		0.96	0.95
sictrl	siSLC24A3		sictrl	siSLC24A4
1.04	1.08		1	1.34
1.05	1.02		0.98	1.44
0.96	0.96		1.02	1.35
EV	SLC8A3		EV	SLC24A2
1.05	0.66		1.01	0.95
1.12	0.53		1.01	0.98
1.02	0.58		0.99	1.01
EV	SLC24A3		EV	SLC24A4
1.02	0.96		0.98	0.61
1.06	0.93		0.89	0.53
0.92	1.04		1.05	0.56
